# Supplementary material for: Characterization of a Cul9–Parkin double knockout mouse model for Parkinson’s disease
Source: PubMed Central journal article supplement (PMC7547682; doi:10.1038/s41598-020-73854-y), 2020-10-09
Supplement: 41598_2020_73854_MOESM1_ESM.pdf [file 41598_2020_73854_MOESM1_ESM.pdf]

# Supplementary Information

## **Characterization of a *Cul9* – *Parkin* double knockout mouse model for Parkinson's disease**

Emilie Hollville, Valerie Joers, Ayumi Nakamura, Vijay Swahari, Malú G. Tansey,  
Sheryl S. Moy and Mohanish Deshmukh

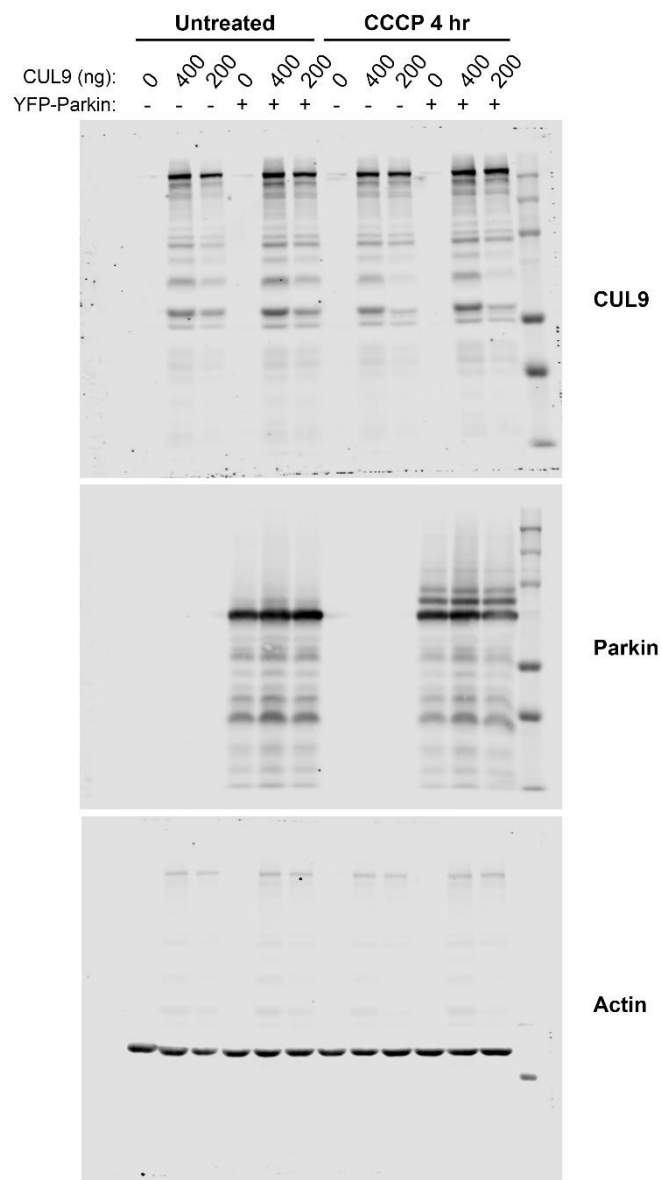

**Supplementary Figure S1.** Overexpression of CUL9 and Parkin in HeLa cells. HeLa cells were transfected with the indicated amount of plasmid encoding CUL9 along with YFP-Parkin construct (200 ng). Cells were treated with CCCP (10  $\mu$ M) for 4 hr and whole-cell lysates were analysed by immunoblotting. Full-length immunoblots of blots presented in Fig. 1c.

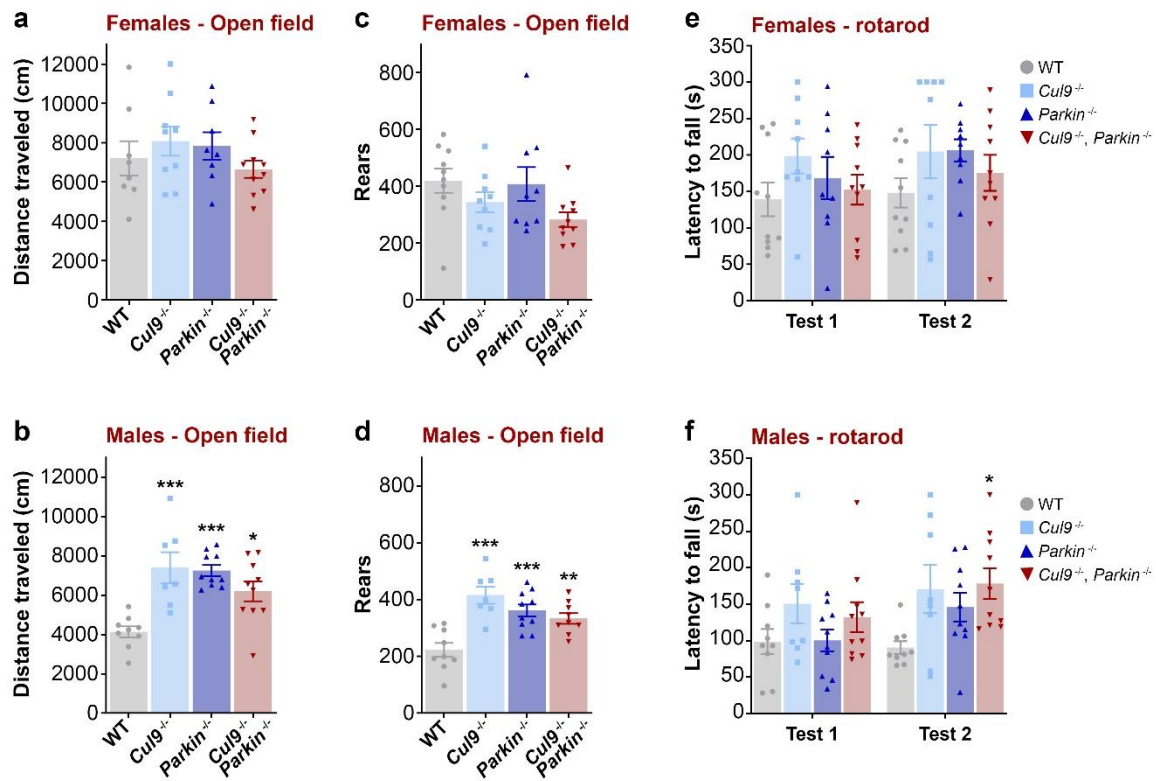

**Supplementary Figure S2.** Locomotor function characterization of aged *Cul9*<sup>-/-</sup>, *Parkin*<sup>-/-</sup> mice. **(a, b)** Total distance travelled and **(c, d)** total number of rears in the open field (1 hr) of *Cul9* and *Parkin* single and double knockout mice (13-14 months old), (females distance:  $n = 8-10$ ; males distance:  $n = 7-10$ ; females rears:  $n = 9-10$ ; males rears:  $n = 7-10$ ). One-way ANOVA with post-hoc Tukey's multiple comparisons test (males distance: WT vs. *Cul9*<sup>-/-</sup>, \*\*\* $p = 0.0003$ ; WT vs. *Parkin*<sup>-/-</sup>, \*\*\* $p = 0.0002$ ; WT vs. *Cul9*<sup>-/-</sup>, *Parkin*<sup>-/-</sup>, \* $p = 0.0141$ ; males rearing: WT vs. *Cul9*<sup>-/-</sup>, \*\*\* $p < 0.0001$ ; WT vs. *Parkin*<sup>-/-</sup>, \*\*\* $p = 0.0008$ ; WT vs. *Cul9*<sup>-/-</sup>, *Parkin*<sup>-/-</sup>, \*\* $p = 0.0100$ ). **(e, f)** Latency to fall from an accelerating rotarod (5 minute test, 48 hr between test 1 and test 2) of *Cul9* and *Parkin* single and double knockout mice (11-12 months old), (females:  $n = 9-10$ ; males:  $n = 8-10$ ). Two-way repeated measures ANOVA with post-hoc Tukey's multiple comparisons test (males test 2: WT vs. *Cul9*<sup>-/-</sup>, *Parkin*<sup>-/-</sup>, \* $p = 0.0173$ ). Means  $\pm$  SEM are shown,  $n$  represents the number of independent animals.

|                                      | age (months) | Females           |                    |                      | Males                      |                  |                    |                      |                            |
|--------------------------------------|--------------|-------------------|--------------------|----------------------|----------------------------|------------------|--------------------|----------------------|----------------------------|
|                                      |              | Wild-type (n)     | <i>Cul9</i> KO (n) | <i>Parkin</i> KO (n) | <i>Cul9, Parkin</i> KO (n) | Wild-type (n)    | <i>Cul9</i> KO (n) | <i>Parkin</i> KO (n) | <i>Cul9, Parkin</i> KO (n) |
| <b>Locomotor function</b>            |              |                   |                    |                      |                            |                  |                    |                      |                            |
| Distance travelled (cm)              | 3-4          | 7687 ± 573 (7)    | 9723 ± 939 (9)     | 5911 ± 504 (9)       | 5913 ± 392 (10)            | 5751 ± 494 (9)   | 6030 ± 105 (7)     | 7225 ± 469 (10)      | 5688 ± 404 (10)            |
| Vertical activity (rears)            | 3-4          | 356 ± 39 (10)     | 303 ± 38 (9)       | 245 ± 27 (9)         | 213 ± 27 (10)              | 317 ± 77 (9)     | 313 ± 30 (9)       | 388 ± 35 (10)        | 263 ± 20 (10)              |
| Rotarod test 2, latency to fall (s)  | 4-5          | 217.6 ± 21.8 (10) | 246.0 ± 19.2 (9)   | 269.0 ± 10.6 (9)     | 264.1 ± 16.1 (9)           | 153.3 ± 16.5 (9) | 261.6.3 ± 19.4 (9) | 260.6 ± 23.0 (10)    | 262.2 ± 16.4 (10)          |
| Distance travelled (cm)              | 13-14        | 7202 ± 876 (8)    | 8085 ± 753 (9)     | 7840 ± 696 (8)       | 6655 ± 444 (10)            | 4139 ± 275 (9)   | 7403 ± 789 (7)     | 7261 ± 273 (10)      | 6205 ± 509 (10)            |
| Vertical activity (rears)            | 13-14        | 420 ± 43 (10)     | 344 ± 35 (9)       | 408 ± 60 (9)         | 283 ± 26 (10)              | 223 ± 25 (9)     | 416 ± 31 (7)       | 362 ± 21 (10)        | 334 ± 19 (9)               |
| Rotarod test 2, latency to fall (s)  | 11-12        | 148.2 ± 20.3 (10) | 204.9 ± 36.7 (9)   | 206.3 ± 15.2 (9)     | 175.5 ± 24.7 (10)          | 90.4 ± 8.7 (9)   | 170.8 ± 33.1 (8)   | 145.9 ± 19.6 (10)    | 178.3 ± 20.9 (10)          |
| <b>Sensory function</b>              |              |                   |                    |                      |                            |                  |                    |                      |                            |
| Hot plate, latency (s)               | 6-7          | 27.0 ± 1.0 (10)   | 30.0 ± 0.1 (9)     | 29.0 ± 0.8 (9)       | 27.0 ± 1.0 (10)            | 28.0 ± 1.0 (9)   | 29.0 ± 0.6 (8)     | 28.0 ± 1.0 (10)      | 28.0 ± 0.8 (10)            |
| Buried food, latency (s)             | 4-5          | 47 ± 11 (8)       | 122 ± 57 (8)       | 80 ± 23 (8)          | 109 ± 20 (10)              | 128 ± 46 (9)     | 144 ± 30 (9)       | 107 ± 32 (9)         | 62 ± 9 (10)                |
| Visible platform day 1, latency (s)  | 4-5          | 21.3 ± 2.8 (10)   | 20.6 ± 2.3 (9)     | 24.1 ± 2.3 (9)       | 22.9 ± 3.3 (9)             | 23.1 ± 3.7 (9)   | 18.6 ± 3.1 (8)     | 17.5 ± 2.8 (9)       | 18.5 ± 2.4 (9)             |
| <b>Cognitive function</b>            |              |                   |                    |                      |                            |                  |                    |                      |                            |
| Spatial learning day 6, latency (s)  | 5-7          | 18.1 ± 2.5 (10)   | 13.6 ± 1.8 (9)     | 16.7 ± 4.3 (9)       | 18.3 ± 3.3 (10)            | 17.4 ± 4.4 (9)   | 13.4 ± 2.1 (9)     | 13.6 ± 1.8 (10)      | 11.2 ± 1.4 (10)            |
| Reversal learning day 7, latency (s) | 5-7          | 21.9 ± 4.8 (10)   | 12.1 ± 2.1 (9)     | 20.0 ± 2.9 (9)       | 17.9 ± 4.6 (10)            | 16.8 ± 5.5 (9)   | 12.3 ± 2.0 (8)     | 9.6 ± 1.5 (10)       | 12.5 ± 2.5 (10)            |

**Supplementary Table S1.** Summary of behavioural tests results for *Cul9* and *Parkin* single and double knockout mice.

|                      | age (months) | Females         |                    |                      | Males                      |                |                    |                      |                            |
|----------------------|--------------|-----------------|--------------------|----------------------|----------------------------|----------------|--------------------|----------------------|----------------------------|
|                      |              | Wild-type (n)   | <i>Cul9</i> KO (n) | <i>Parkin</i> KO (n) | <i>Cul9, Parkin</i> KO (n) | Wild-type (n)  | <i>Cul9</i> KO (n) | <i>Parkin</i> KO (n) | <i>Cul9, Parkin</i> KO (n) |
| <b>Stereology</b>    |              |                 |                    |                      |                            |                |                    |                      |                            |
| TH-positive cells    | 17-19        | 4170 ± 143 (4)  | 5355 ± 342 (4)     | 4717 ± 464 (3)       | 5046 ± 381 (4)             | 4261 ± 116 (5) | 4904 ± 270 (3)     | 5056 ± 391 (6)       | 4926 ± 378 (5)             |
| Nissl-positive cells | 17-19        | 6692 ± 1017 (4) | 8607 ± 976 (4)     | 8028 ± 289 (3)       | 8433 ± 538 (4)             | 6771 ± 818 (5) | 9513 ± 951 (3)     | 8718 ± 848 (6)       | 7445 ± 941 (5)             |

**Supplementary Table S2.** Stereological analysis of the SNpc of *Cul9* and *Parkin* single and double knockout mice.
